# Supplementary material for: Two HIV-1 Variants Resistant to Small Molecule CCR5 Inhibitors Differ in How They Use CCR5 for Entry
Source: PubMed Central journal article supplement (PMC2718843; doi:10.1371/journal.ppat.1000548), 2009-08-14
Supplement: ppat.1000548.s001.pdf [file ppat.1000548.s001.pdf]

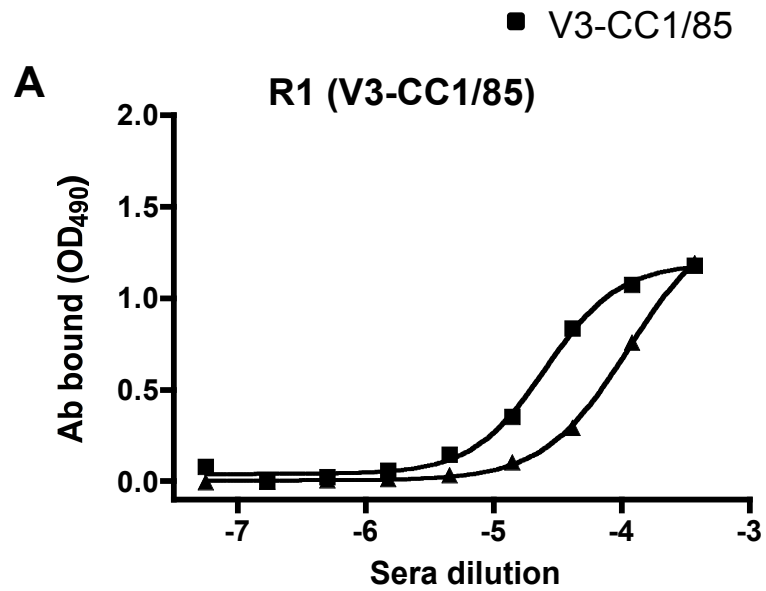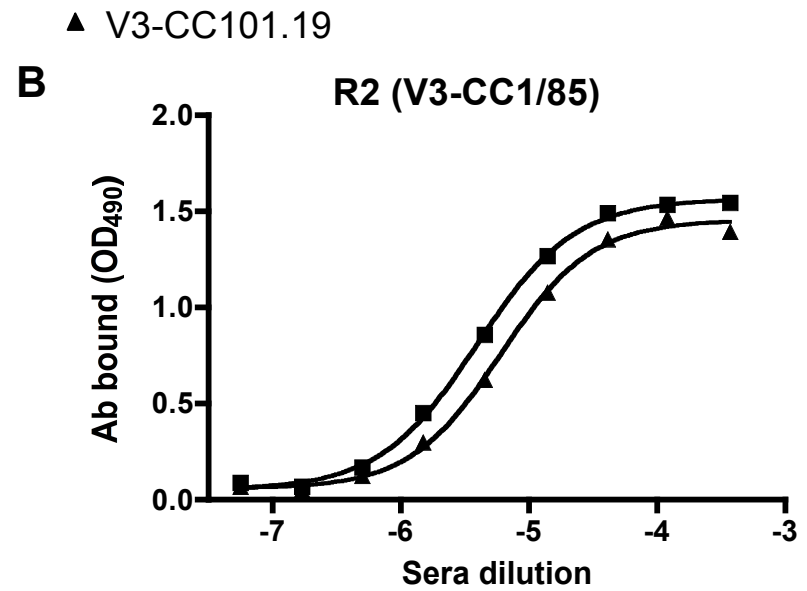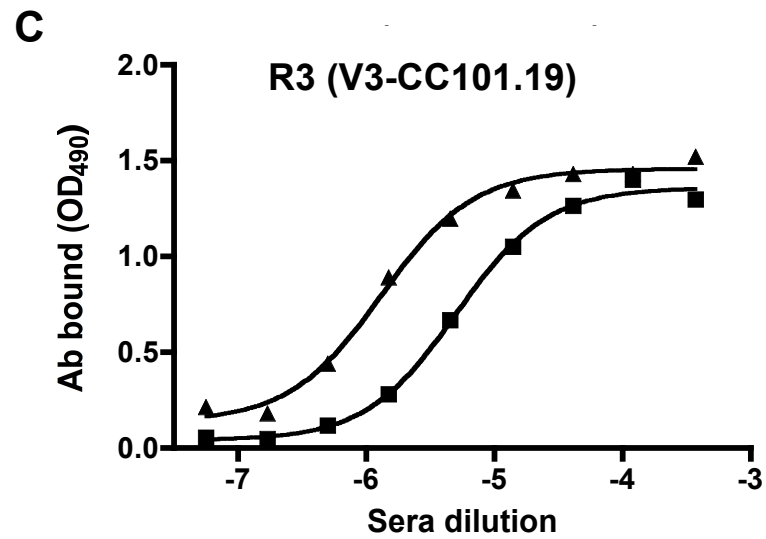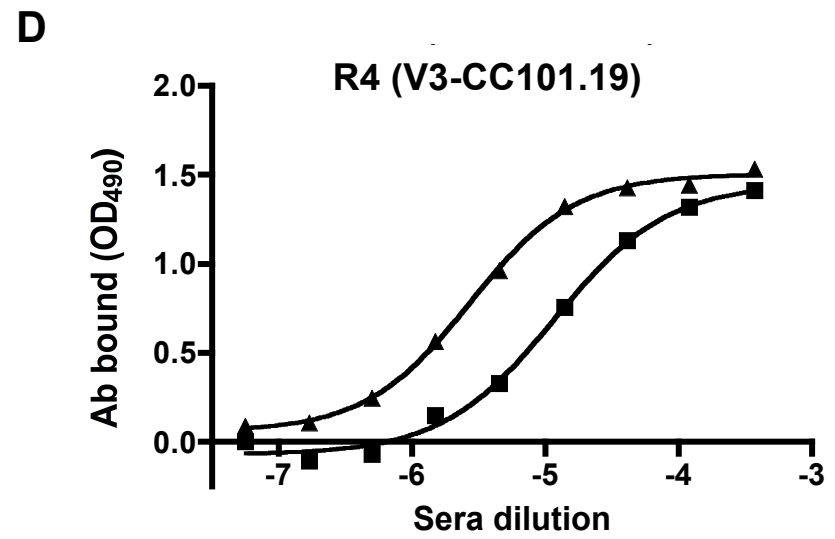

**E**

|                           | V3-CC1/85 |      |      |      | V3-CC101.19 |      |     |     |
|---------------------------|-----------|------|------|------|-------------|------|-----|-----|
|                           | R1        | R2   | R3   | R4   | R1          | R2   | R3  | R4  |
| Endpoint titer ( $10^6$ ) | 0.77      | 24.4 | 3.5  | 2.03 | 0.19        | 8    | 8.4 | 4.6 |
| Midpoint titer ( $10^5$ ) | 0.41      | 2.7  | 2.12 | 0.79 | 0.088       | 1.81 | 9.3 | 4   |
