# Supplementary material for: Two HIV-1 Variants Resistant to Small Molecule CCR5 Inhibitors Differ in How They Use CCR5 for Entry
Source: PubMed Central journal article supplement (PMC2718843; doi:10.1371/journal.ppat.1000548), 2009-08-14

■ R1 (V3- CC1/85)    ● R2 (V3- CC1/85)    □ R3 (V3- CC101.19)    ○ R4 (V3- CC101.19)

**A**

**CC1/85 cl.7 gp120**

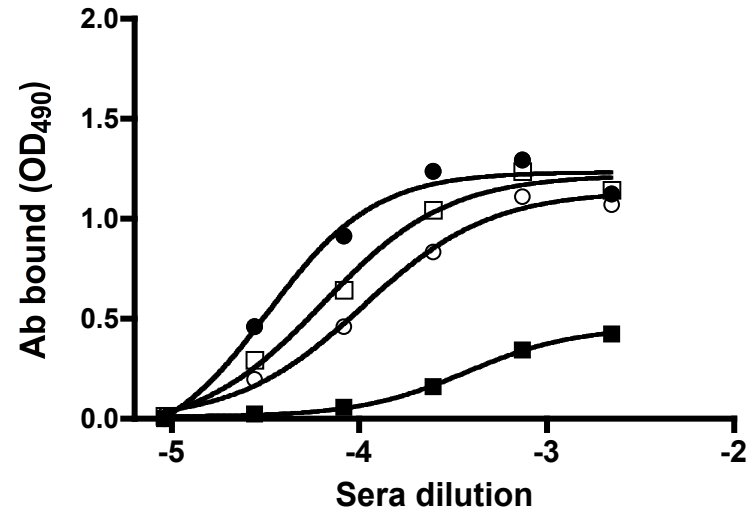

**B**

**CC101.19 cl.7 gp120**

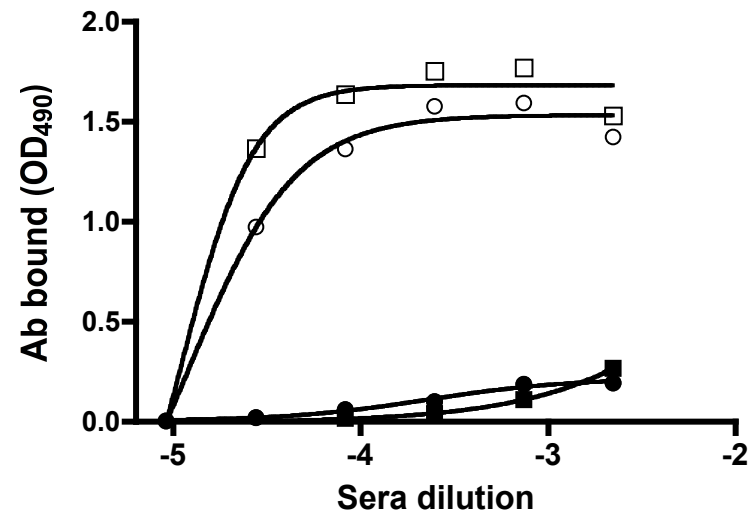

Supplement: ppat.1000548.s002.pdf [file ppat.1000548.s002.pdf]
