# Supplementary material for: Two HIV-1 Variants Resistant to Small Molecule CCR5 Inhibitors Differ in How They Use CCR5 for Entry
Source: PubMed Central journal article supplement (PMC2718843; doi:10.1371/journal.ppat.1000548), 2009-08-14
Supplement: ppat.1000548.s003.pdf [file ppat.1000548.s003.pdf]

**Table S1.** Summary of some phenotypic characteristics of CCR5 inhibitor-sensitive and -resistant viral clones

| <b>Clone name</b> | <b>Site of resistance mutations</b> | <b>CCR5 inhibitor sensitivity</b> | <b>sCD4 sensitivity</b> | <b>Dependence on CCR5 NT</b> | <b>CD4i epitope exposure</b> | <b>V3 epitope exposure</b> |
|-------------------|-------------------------------------|-----------------------------------|-------------------------|------------------------------|------------------------------|----------------------------|
| CC1/85 cl.7       | N/A                                 | +                                 | +                       | -                            | -                            | -*                         |
| CC1/85 cl.6       | N/A                                 | +                                 | -                       | -                            | -                            | -                          |
| CC101.19 cl.7     | gp120 V3                            | -                                 | +                       | +                            | +                            | +                          |
| D1/85.16 cl.23    | gp41 FP                             | -                                 | -                       | -                            | -                            | -                          |

\* This clone was partially sensitive to neutralization with V3 MAbs.

Note that the terminology used (+ vs -) is non-quantitative and does not denote absolutes; a listing of (+) means that the phenotype is more pronounced than when (-) is recorded.
